# Supplementary material for: Watered-Based Graphene Dispersion Stabilized by a Graft Co-Polymer for Electrically Conductive Screen Printing
Source: MDPI journal article supplement (doi:10.3390/polym15020356), 2023-01-10
Supplement: s1 [file s1]

# Watered-based graphene dispersion stabilized by a graft co-polymer for electrically conductive screen printing

## Supporting information

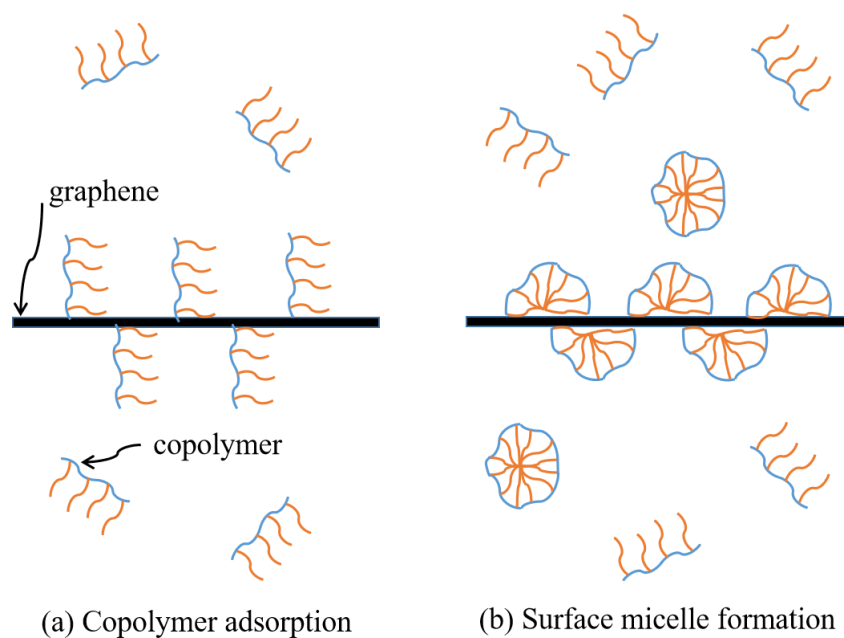

**Figure S1.** Schematic representation of the stabilization mechanism

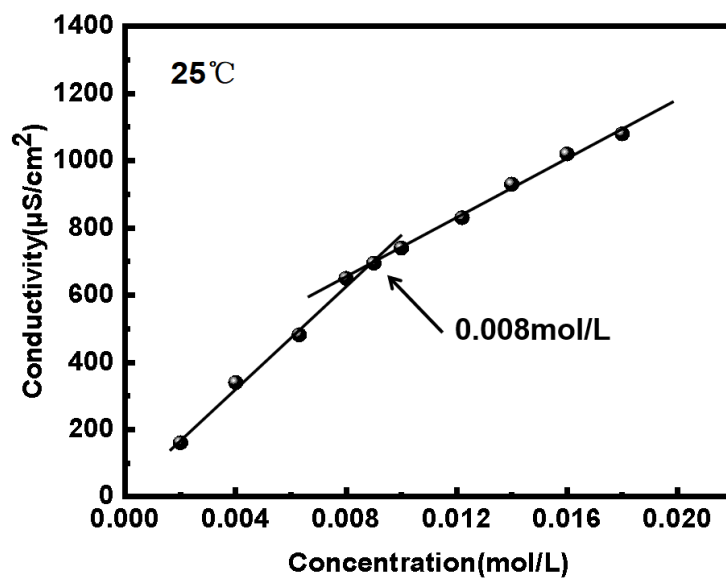

Figure S2. Conductivity of the micellar solutions with different concentration

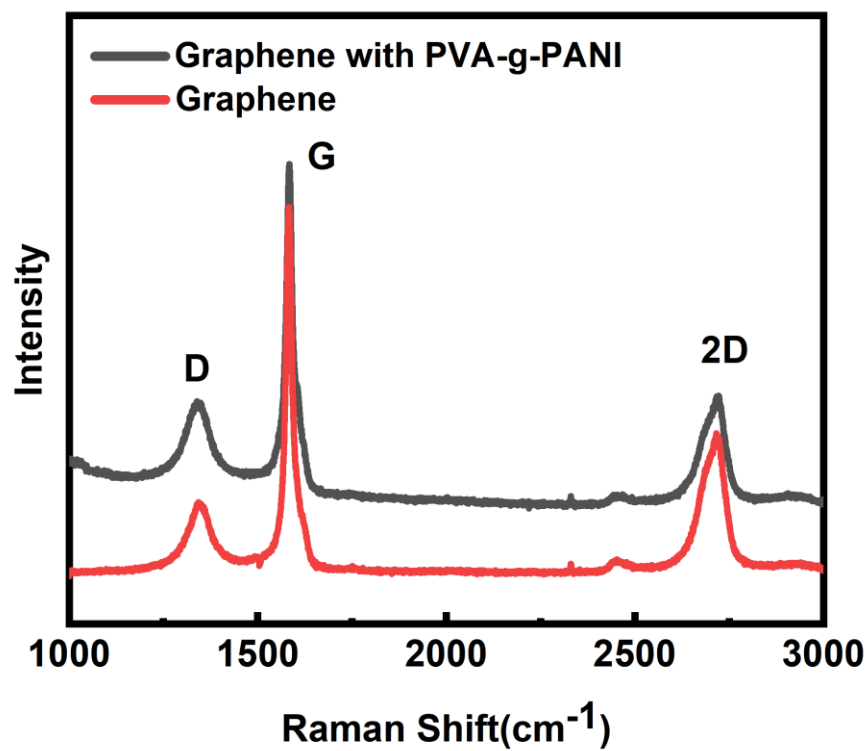

Figure S3. Raman spectra of graphene and graphene with PVA-g-PAN

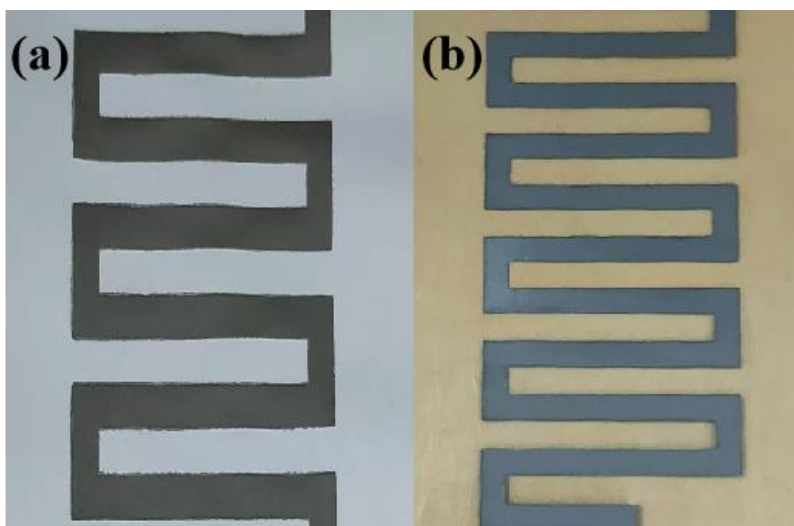

**Figure S4.** The patterns of graphene dispersion on (a)A4 paper; (b) PET.
